# Supplementary material for: Influence of Harvest Time and Malaxation Conditions on the Concentration of Individual Phenols in Extra Virgin Olive Oil Related to Its Healthy Properties
Source: PubMed Central journal article supplement (PMC7287853; doi:10.3390/molecules25102449), 2020-05-24
Supplement: molecules-25-02449-s001.pdf [file molecules-25-02449-s001.pdf]

*Supplementary data*

# **Influence of harvest time and malaxation conditions on the concentration of individual phenols in extra virgin olive oil related to its healthy properties**

**Panagiotis Diamantakos, Triada Giannara, Maria Skarkou, Eleni Melliou, Prokopios Magiatis\***

Laboratory of Pharmacognosy and Natural Products Chemistry, Department of Pharmacy, National and Kapodistrian University of Athens, Panepistimiopolis Zografou, Athens 15771, Greece

\* Correspondence: [magiatis@pharm.uoa.gr](mailto:magiatis@pharm.uoa.gr)

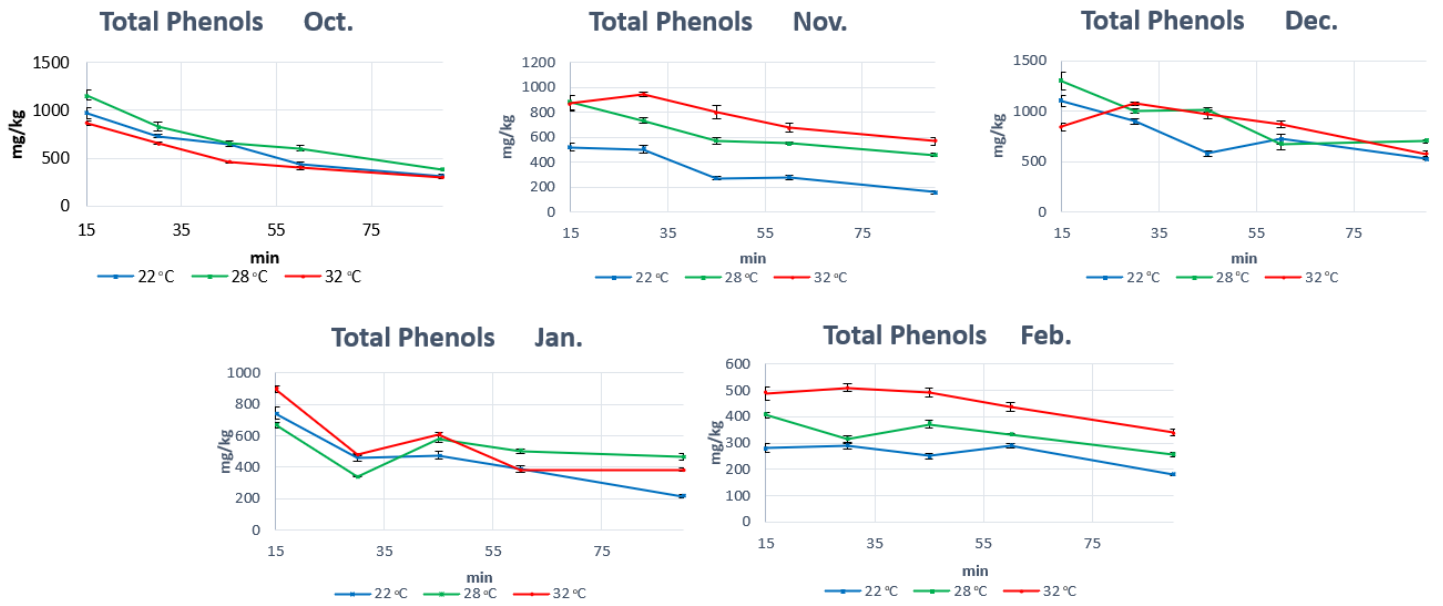

**Figure S1.** The concentration of Total Phenols in three different malaxation temperatures (22,28,32 °C) for 5 different harvest months

**Table S1.** Quantitation data for Oleocanthal in Koroneiki variety in 5 different harvest months, 3 different malaxation temperatures and 5 different malaxation times.

|                 |                 | <b>cv. Koroneiki</b> |       |                  |       |                  |       |
|-----------------|-----------------|----------------------|-------|------------------|-------|------------------|-------|
|                 |                 | T=22 °C              |       | T=28 °C          |       | T=32 °C          |       |
| <b>October</b>  | Malaxation time | Oleocanthal mean     | SD    | Oleocanthal mean | SD    | Oleocanthal mean | SD    |
|                 | min             | mg/Kg                | mg/Kg | mg/Kg            | mg/Kg | mg/Kg            | mg/Kg |
|                 | 15              | 90                   | 8     | 213              | 9     | 208              | 18    |
|                 | 30              | 117                  | 2     | 254              | 26    | 254              | 18    |
|                 | 45              | 139                  | 7     | 264              | 9     | 237              | 9     |
|                 | 60              | 147                  | 14    | 252              | 17    | 237              | 21    |
|                 | 90              | 129                  | 5     | 204              | 6     | 185              | 6     |
| <b>November</b> | Malaxation time | Oleocanthal mean     | SD    | Oleocanthal mean | SD    | Oleocanthal mean | SD    |
|                 | min             | mg/Kg                | mg/Kg | mg/Kg            | mg/Kg | mg/Kg            | mg/Kg |
|                 | 15              | 53                   | 3     | 150              | 11    | 136              | 11    |
|                 | 30              | 99                   | 4     | 188              | 9     | 254              | 23    |
|                 | 45              | 106                  | 2     | 195              | 18    | 267              | 20    |
|                 | 60              | 132                  | 8     | 234              | 14    | 306              | 14    |
|                 | 90              | 117                  | 8     | 254              | 10    | 314              | 22    |
| <b>December</b> | Malaxation time | Oleocanthal mean     | SD    | Oleocanthal mean | SD    | Oleocanthal mean | SD    |
|                 | min             | mg/Kg                | mg/Kg | mg/Kg            | mg/Kg | mg/Kg            | mg/Kg |
|                 | 15              | 44                   | 2     | 96               | 9     | 144              | 11    |
|                 | 30              | 88                   | 5     | 150              | 12    | 168              | 12    |
|                 | 45              | 114                  | 2     | 190              | 10    | 201              | 20    |
|                 | 60              | 134                  | 7     | 221              | 19    | 252              | 9     |
|                 | 90              | 136                  | 8     | 237              | 16    | 218              | 18    |
| <b>January</b>  | Malaxation time | Oleocanthal mean     | SD    | Oleocanthal mean | SD    | Oleocanthal mean | SD    |
|                 | min             | mg/Kg                | mg/Kg | mg/Kg            | mg/Kg | mg/Kg            | mg/Kg |
|                 | 15              | 39                   | 2     | 68               | 3     | 116              | 6     |
|                 | 30              | 67                   | 6     | 67               | 8     | 106              | 9     |
|                 | 45              | 83                   | 6     | 124              | 8     | 160              | 9     |
|                 | 60              | 85                   | 3     | 108              | 4     | 117              | 4     |
|                 | 90              | 91                   | 6     | 137              | 7     | 183              | 7     |
| <b>February</b> | Malaxation time | Oleocanthal mean     | SD    | Oleocanthal mean | SD    | Oleocanthal mean | SD    |
|                 | min             | mg/Kg                | mg/Kg | mg/Kg            | mg/Kg | min              | mg/Kg |
|                 | 15              | 21                   | 0     | 52               | 4     | 78               | 3     |
|                 | 30              | 42                   | 2     | 63               | 5     | 72               | 0     |
|                 | 45              | 45                   | 3     | 53               | 4     | 85               | 4     |
|                 | 60              | 60                   | 1     | 89               | 3     | 116              | 5     |
|                 | 90              | 73                   | 0     | 104              | 9     | 127              | 10    |

**Table S2.** Quantitation data for Oleacein in Koroneiki variety in 5 different harvest months, 3 different malaxation temperatures and 5 different malaxation times

|                 |                 | <b>cv. Koroneiki</b> |       |               |       |               |       |
|-----------------|-----------------|----------------------|-------|---------------|-------|---------------|-------|
|                 |                 | T=22 °C              |       | T=28 °C       |       | T=32 °C       |       |
| <b>October</b>  | Malaxation time | Oleacein mean        | SD    | Oleacein mean | SD    | Oleacein mean | SD    |
|                 | min             | mg/Kg                | mg/Kg | mg/Kg         | mg/Kg | mg/Kg         | mg/Kg |
|                 | 15              | 59                   | 4     | 112           | 10    | 95            | 10    |
|                 | 30              | 56                   | 4     | 68            | 6     | 56            | 1     |
|                 | 45              | 36                   | 2     | 42            | 3     | 24            | 3     |
|                 | 60              | 25                   | 2     | 30            | 2     | 7             | 0     |
|                 | 90              | 7                    | 0     | 7             | 0     | 7             | 0     |
| <b>November</b> | Malaxation time | Oleacein mean        | SD    | Oleacein mean | SD    | Oleacein mean | SD    |
|                 | min             | mg/Kg                | mg/Kg | mg/Kg         | mg/Kg | mg/Kg         | mg/Kg |
|                 | 15              | 48                   | 1     | 135           | 3     | 130           | 11    |
|                 | 30              | 51                   | 4     | 138           | 10    | 201           | 13    |
|                 | 45              | 53                   | 2     | 119           | 2     | 188           | 15    |
|                 | 60              | 42                   | 3     | 109           | 3     | 116           | 8     |
|                 | 90              | 18                   | 0     | 61            | 2     | 65            | 2     |
| <b>December</b> | Malaxation time | Oleacein mean        | SD    | Oleacein mean | SD    | Oleacein mean | SD    |
|                 | min             | mg/Kg                | mg/Kg | mg/Kg         | mg/Kg | mg/Kg         | mg/Kg |
|                 | 15              | 56                   | 1     | 123           | 11    | 147           | 11    |
|                 | 30              | 80                   | 6     | 147           | 7     | 198           | 16    |
|                 | 45              | 92                   | 3     | 169           | 11    | 195           | 11    |
|                 | 60              | 89                   | 7     | 162           | 12    | 186           | 11    |
|                 | 90              | 66                   | 6     | 130           | 7     | 73            | 7     |
| <b>January</b>  | Malaxation time | Oleacein mean        | SD    | Oleacein mean | SD    | Oleacein mean | SD    |
|                 | min             | mg/Kg                | mg/Kg | mg/Kg         | mg/Kg | mg/Kg         | mg/Kg |
|                 | 15              | 49                   | 3     | 58            | 3     | 114           | 10    |
|                 | 30              | 42                   | 1     | 53            | 1     | 109           | 8     |
|                 | 45              | 48                   | 3     | 89            | 8     | 107           | 8     |
|                 | 60              | 39                   | 3     | 77            | 2     | 82            | 2     |
|                 | 90              | 25                   | 0     | 83            | 7     | 53            | 0     |
| <b>February</b> | Malaxation time | Oleacein mean        | SD    | Oleacein mean | SD    | Oleacein mean | SD    |
|                 | min             | mg/Kg                | mg/Kg | mg/Kg         | mg/Kg | min           | mg/Kg |
|                 | 15              | 29                   | 2     | 70            | 4     | 112           | 10    |
|                 | 30              | 51                   | 0     | 73            | 4     | 126           | 3     |
|                 | 45              | 49                   | 3     | 87            | 8     | 133           | 6     |
|                 | 60              | 53                   | 4     | 90            | 5     | 143           | 5     |
|                 | 90              | 58                   | 0     | 68            | 0     | 92            | 8     |

**Table S3.** Quantitation data for Oleokoronal in Koroneiki variety in 5 different harvest months, 3 different malaxation temperatures and 5 different malaxation times

|          |                 | cv. Koroneiki    |       |                  |       |                  |       |
|----------|-----------------|------------------|-------|------------------|-------|------------------|-------|
|          |                 | T=22 °C          |       | T=28 °C          |       | T=32 °C          |       |
| October  | Malaxation time | Oleokoronal mean | SD    | Oleokoronal mean | SD    | Oleokoronal mean | SD    |
|          | min             | mg/Kg            | mg/Kg | mg/Kg            | mg/Kg | mg/Kg            | mg/Kg |
|          | 15              | 520              | 36    | 476              | 22    | 353              | 21    |
|          | 30              | 371              | 11    | 306              | 13    | 241              | 15    |
|          | 45              | 353              | 22    | 250              | 9     | 139              | 2     |
|          | 60              | 204              | 4     | 260              | 10    | 102              | 8     |
|          | 90              | 148              | 9     | 120              | 2     | 48               | 4     |
| November | Malaxation time | Oleokoronal mean | SD    | Oleokoronal mean | SD    | Oleokoronal mean | SD    |
|          | min             | mg/Kg            | mg/Kg | mg/Kg            | mg/Kg | mg/Kg            | mg/Kg |
|          | 15              | 297              | 13    | 343              | 29    | 343              | 23    |
|          | 30              | 213              | 16    | 232              | 1     | 269              | 14    |
|          | 45              | 64               | 5     | 139              | 6     | 195              | 14    |
|          | 60              | 64               | 5     | 100              | 9     | 127              | 9     |
|          | 90              | n.d.             | 0     | 64               | 6     | 111              | 10    |
| December | Malaxation time | Oleokoronal mean | SD    | Oleokoronal mean | SD    | Oleokoronal mean | SD    |
|          | min             | mg/Kg            | mg/Kg | mg/Kg            | mg/Kg | mg/Kg            | mg/Kg |
|          | 15              | 576              | 35    | 613              | 38    | 269              | 26    |
|          | 30              | 455              | 14    | 399              | 12    | 371              | 18    |
|          | 45              | 185              | 16    | 362              | 22    | 278              | 15    |
|          | 60              | 334              | 24    | 139              | 17    | 204              | 14    |
|          | 90              | 288              | 3     | 204              | 1     | 181              | 5     |
| January  | Malaxation time | Oleokoronal mean | SD    | Oleokoronal mean | SD    | Oleokoronal mean | SD    |
|          | min             | mg/Kg            | mg/Kg | mg/Kg            | mg/Kg | mg/Kg            | mg/Kg |
|          | 15              | 300              | 17    | 240              | 9     | 295              | 8     |
|          | 30              | 200              | 21    | 100              | 9     | 100              | 10    |
|          | 45              | 200              | 11    | 180              | 9     | 160              | 5     |
|          | 60              | 150              | 12    | 150              | 7     | 62               | 1     |
|          | 90              | 60               | 9     | 70               | 0     | 60               | 0     |
| February | Malaxation time | Oleokoronal mean | SD    | Oleokoronal mean | SD    | Oleokoronal mean | SD    |
|          | min             | mg/Kg            | mg/Kg | mg/Kg            | mg/Kg | min              | mg/Kg |
|          | 15              | 102              | 7     | 120              | 2     | 120              | 9     |
|          | 30              | 64               | 2     | 46               | 4     | 120              | 9     |
|          | 45              | 69               | 2     | 83               | 4     | 102              | 10    |
|          | 60              | 64               | 4     | 74               | 4     | 64               | 0     |
|          | 90              | 27               | 1     | 36               | 0     | 64               | 0     |

**Table S4.** Quantitation data for Oleomissional in Koroneiki variety in 5 different harvest months, 3 different malaxation temperatures and 5 different malaxation times

|          |                 | cv. Koroneiki      |       |                    |       |                    |       |
|----------|-----------------|--------------------|-------|--------------------|-------|--------------------|-------|
|          |                 | T=22 °C            |       | T=28 °C            |       | T=32 °C            |       |
| October  | Malaxation time | Oleomissional mean | SD    | Oleomissional mean | SD    | Oleomissional mean | SD    |
|          | min             | mg/Kg              | mg/Kg | mg/Kg              | mg/Kg | mg/Kg              | mg/Kg |
|          | 15              | 264                | 11    | 288                | 18    | 137                | 4     |
|          | 30              | 157                | 1     | 135                | 4     | 40                 | 1     |
|          | 45              | 79                 | 5     | 35                 | 3     | n.d.               | 0     |
|          | 60              | 23                 | 2     | n.d.               | 0     | n.d.               | 0     |
|          | 90              | n.d.               | 0     | n.d.               | 0     | n.d.               | 0     |
| November | Malaxation time | Oleomissional mean | SD    | Oleomissional mean | SD    | Oleomissional mean | SD    |
|          | min             | mg/Kg              | mg/Kg | mg/Kg              | mg/Kg | mg/Kg              | mg/Kg |
|          | 15              | 89                 | 19    | 176                | 15    | 215                | 18    |
|          | 30              | 98                 | 2     | 98                 | 8     | 128                | 6     |
|          | 45              | n.d.               | 8     | 50                 | 1     | 52                 | 5     |
|          | 60              | n.d.               | 6     | 35                 | 4     | 16                 | 0     |
|          | 90              | n.d.               | 0     | n.d.               | 0     | n.d.               | 0     |
| December | Malaxation time | Oleomissional mean | SD    | Oleomissional mean | SD    | Oleomissional mean | SD    |
|          | min             | mg/Kg              | mg/Kg | mg/Kg              | mg/Kg | mg/Kg              | mg/Kg |
|          | 15              | 381                | 11    | 371                | 40    | 176                | 11    |
|          | 30              | 215                | 7     | 215                | 13    | 215                | 2     |
|          | 45              | 108                | 7     | 176                | 11    | 137                | 8     |
|          | 60              | 101                | 6     | 50                 | 3     | 79                 | 2     |
|          | 90              | n.d.               | 0     | 50                 | 0     | n.d.               | 0     |
| January  | Malaxation time | Oleomissional mean | SD    | Oleomissional mean | SD    | Oleomissional mean | SD    |
|          | min             | mg/Kg              | mg/Kg | mg/Kg              | mg/Kg | mg/Kg              | mg/Kg |
|          | 15              | 290                | 7     | 205                | 23    | 210                | 11    |
|          | 30              | 80                 | 6     | 50                 | 1     | 50                 | 2     |
|          | 45              | 70                 | 2     | 80                 | 10    | 70                 | 1     |
|          | 60              | 60                 | 1     | 80                 | 5     | 30                 | 1     |
|          | 90              | n.d.               | 0     | 80                 | 5     | 5                  | 0     |
| February | Malaxation time | Oleomissional mean | SD    | Oleomissional mean | SD    | Oleomissional mean | SD    |
|          | min             | mg/Kg              | mg/Kg | mg/Kg              | mg/Kg | min                | mg/Kg |
|          | 15              | 118                | 7     | 118                | 9     | 118                | 9     |
|          | 30              | 108                | 7     | 96                 | 5     | 118                | 9     |
|          | 45              | 64                 | 3     | 95                 | 5     | 118                | 9     |
|          | 60              | 89                 | 6     | 30                 | 3     | 40                 | 4     |
|          | 90              | 11                 | 0     | n.d.               | 0     | n.d.               | 0     |

**Table S5.** Quantitation data for Total Phenols in Koroneiki variety in 5 different harvest months, 3 different malaxation temperatures and 5 different malaxation times

| cv. Koroneiki   |                 |                    |       |                    |       |                    |       |
|-----------------|-----------------|--------------------|-------|--------------------|-------|--------------------|-------|
|                 |                 | T=22 °C            |       | T=28 °C            |       | T=32 °C            |       |
| <b>October</b>  | Malaxation time | Total Phenols mean | SD    | Total Phenols mean | SD    | Total Phenols mean | SD    |
|                 | min             | mg/Kg              | mg/Kg | mg/Kg              | mg/Kg | mg/Kg              | mg/Kg |
|                 | 15              | 973                | 60    | 1320               | 60    | 867                | 25    |
|                 | 30              | 732                | 21    | 1106               | 40    | 654                | 11    |
|                 | 45              | 647                | 29    | 1081               | 51    | 457                | 6     |
|                 | 60              | 435                | 26    | 1000               | 35    | 406                | 29    |
|                 | 90              | 313                | 15    | 835                | 26    | 295                | 5     |
| <b>November</b> | Malaxation time | Total Phenols mean | SD    | Total Phenols mean | SD    | Total Phenols mean | SD    |
|                 | min             | mg/Kg              | mg/Kg | mg/Kg              | mg/Kg | mg/Kg              | mg/Kg |
|                 | 15              | 520                | 29    | 878                | 60    | 871                | 59    |
|                 | 30              | 502                | 31    | 732                | 20    | 941                | 16    |
|                 | 45              | 271                | 10    | 569                | 27    | 798                | 55    |
|                 | 60              | 276                | 14    | 552                | 6     | 675                | 32    |
|                 | 90              | 157                | 10    | 457                | 16    | 568                | 31    |
| <b>December</b> | Malaxation time | Total Phenols mean | SD    | Total Phenols mean | SD    | Total Phenols mean | SD    |
|                 | min             | mg/Kg              | mg/Kg | mg/Kg              | mg/Kg | mg/Kg              | mg/Kg |
|                 | 15              | 1102               | 56    | 1301               | 88    | 845                | 38    |
|                 | 30              | 901                | 28    | 1003               | 20    | 1075               | 19    |
|                 | 45              | 580                | 26    | 1015               | 22    | 969                | 49    |
|                 | 60              | 722                | 49    | 673                | 53    | 867                | 31    |
|                 | 90              | 528                | 6     | 700                | 16    | 574                | 28    |
| <b>January</b>  | Malaxation time | Total Phenols mean | SD    | Total Phenols mean | SD    | Total Phenols mean | SD    |
|                 | min             | mg/Kg              | mg/Kg | mg/Kg              | mg/Kg | mg/Kg              | mg/Kg |
|                 | 15              | 745                | 37    | 670                | 18    | 896                | 20    |
|                 | 30              | 463                | 25    | 342                | 5     | 480                | 3     |
|                 | 45              | 475                | 24    | 579                | 19    | 609                | 11    |
|                 | 60              | 391                | 20    | 502                | 17    | 379                | 10    |
|                 | 90              | 214                | 10    | 466                | 19    | 385                | 8     |
| <b>February</b> | Malaxation time | Total Phenols mean | SD    | Total Phenols mean | SD    | Total Phenols mean | SD    |
|                 | min             | mg/Kg              | mg/Kg | mg/Kg              | mg/Kg | min                | mg/Kg |
|                 | 15              | 281                | 16    | 406                | 12    | 489                | 24    |
|                 | 30              | 289                | 11    | 315                | 14    | 511                | 13    |
|                 | 45              | 251                | 11    | 371                | 15    | 491                | 17    |
|                 | 60              | 290                | 9     | 333                | 3     | 438                | 18    |
|                 | 90              | 180                | 3     | 256                | 10    | 341                | 13    |

**Table S6.** Quantitation data for cv. Athenolia in 4 different harvest months, 5 different malaxation times at 28 °C

|     | Mal. Time (min) | Oleocanthal |    | Oleacein |    | Oleokoronal |    | Oleomissional |    | Ligstroside Ag. |    | Oleuropein Ag. |    | Total Phenols |    |
|-----|-----------------|-------------|----|----------|----|-------------|----|---------------|----|-----------------|----|----------------|----|---------------|----|
|     |                 | mean        | SD | mean     | SD | mean        | SD | mean          | SD | mean            | SD | mean           | SD | mean          | SD |
| Nov | 15              | 99          | 4  | 80       | 10 | 687         | 33 | 371           | 18 | 41              | 3  | 42             | 0  | 1320          | 60 |
|     | 30              | 150         | 9  | 92       | 4  | 492         | 11 | 284           | 18 | 43              | 3  | 45             | 2  | 1106          | 40 |
|     | 45              | 195         | 13 | 99       | 9  | 427         | 34 | 264           | 10 | 53              | 3  | 43             | 2  | 1081          | 51 |
|     | 60              | 224         | 17 | 95       | 9  | 427         | 13 | 147           | 3  | 57              | 2  | 50             | 3  | 1000          | 35 |
|     | 90              | 270         | 10 | 82       | 8  | 297         | 11 | 60            | 0  | 76              | 3  | 50             | 2  | 835           | 26 |
| Dec | 15              | 67          | 5  | 61       | 2  | 632         | 38 | 352           | 13 | 20              | 0  | 30             | 1  | 1162          | 55 |
|     | 30              | 152         | 6  | 83       | 10 | 315         | 10 | 69            | 4  | 22              | 1  | 35             | 0  | 676           | 27 |
|     | 45              | 119         | 5  | 80       | 6  | 353         | 10 | 64            | 4  | 18              | 1  | 16             | 1  | 650           | 13 |
|     | 60              | 106         | 13 | 75       | 9  | 436         | 16 | 137           | 11 | 22              | 2  | 16             | 1  | 792           | 42 |
|     | 90              | 142         | 11 | 51       | 3  | 213         | 8  | 0             | 0  | 32              | 1  | 14             | 0  | 452           | 15 |
| Jan | 15              | 63          | 5  | 37       | 2  | 362         | 4  | 98            | 3  | 20              | 0  | 25             | 1  | 605           | 6  |
|     | 30              | 78          | 6  | 39       | 0  | 334         | 12 | 88            | 9  | 27              | 1  | 30             | 0  | 596           | 20 |
|     | 45              | 98          | 5  | 29       | 0  | 278         | 8  | 36            | 10 | 22              | 1  | 16             | 1  | 479           | 19 |
|     | 60              | 99          | 7  | 30       | 2  | 120         | 4  | 25            | 11 | 27              | 2  | 18             | 1  | 319           | 12 |
|     | 90              | 104         | 11 | 24       | 2  | 129         | 11 | 16            | 0  | 27              | 1  | 18             | 1  | 318           | 24 |
| Feb | 15              | 52          | 2  | 36       | 0  | 55          | 3  | n.d.          | 0  | n.d.            | 0  | 11             | 0  | 154           | 4  |
|     | 30              | 55          | 3  | 32       | 2  | 27          | 0  | n.d.          | 0  | n.d.            | 0  | n.d.           | 0  | 114           | 5  |
|     | 45              | 57          | 2  | 30       | 2  | 27          | 3  | n.d.          | 0  | n.d.            | 0  | n.d.           | 0  | 114           | 6  |
|     | 60              | 60          | 4  | 20       | 2  | 29          | 3  | n.d.          | 0  | n.d.            | 0  | n.d.           | 0  | 108           | 9  |
|     | 90              | 60          | 3  | 7        | 0  | 22          | 0  | n.d.          | 0  | n.d.            | 0  | n.d.           | 0  | 89            | 3  |



**Table S7.** Quantitation data for cv Throubolia in three different malaxation times at 28 °C

| Malaxation Time | Oleocanthal |      | Oleacein |      | Oleokoronal |      | Oleomissional |      | Ligstroside Ag. |      | Oleuropein Ag. |      | Total Phenols |      |
|-----------------|-------------|------|----------|------|-------------|------|---------------|------|-----------------|------|----------------|------|---------------|------|
|                 | (min)       | mean | SD       | mean | SD          | mean | SD            | mean | SD              | mean | SD             | mean | SD            | mean |
| 15              | 20          | 0    | 22       | 1    | 833         | 18   | 599           | 21   | 35              | 3    | 41             | 3    | 1550          | 36   |
| 30              | 34          | 2    | 28       | 2    | 600         | 26   | 521           | 28   | 95              | 6    | 46             | 3    | 1324          | 63   |
| 60              | 40          | 3    | 32       | 2    | 507         | 26   | 248           | 5    | 79              | 3    | 65             | 2    | 972           | 36   |

**Table S8.** Quantitation data for cv. Kalamata variety in three different malaxation times at 28 °C

| Malaxation Time | Oleocanthal |      | Oleacein |      | Oleokoronal |      | Oleomissional |      | Ligstroside Ag. |      | Oleuropein Ag. |      | Total Phenols |      |
|-----------------|-------------|------|----------|------|-------------|------|---------------|------|-----------------|------|----------------|------|---------------|------|
|                 | (min)       | mean | SD       | mean | SD          | mean | SD            | mean | SD              | mean | SD             | mean | SD            | mean |
| 15              | 748         | 52   | 202      | 9    | 20          | 1    | 20            | 1    | 5               | 0    | 5              | 0    | 1000          | 67   |
| 30              | 972         | 48   | 153      | 6    | 0           | 0    | 0             | 0    | 5               | 0    | 0              | 0    | 1130          | 66   |
| 60              | 947         | 27   | 98       | 3    | 0           | 0    | 0             | 0    | 0               | 0    | 0              | 0    | 1045          | 35   |

**Table S9.** Quantitation data for cv. Olympia in three different malaxation times at 28 °C

| Malaxation Time<br>(min) | Oleocanthal |    | Oleacein |    | Oleokoronol |    | Oleomissional |    | Ligstroside Ag. |    | Oleuropein Ag. |    | Total Phenols |    |
|--------------------------|-------------|----|----------|----|-------------|----|---------------|----|-----------------|----|----------------|----|---------------|----|
|                          | mean        | SD | mean     | SD | mean        | SD | mean          | SD | mean            | SD | mean           | SD | mean          | SD |
| 15                       | 40          | 3  | 15       | 1  | 422         | 31 | 387           | 21 | 7               | 1  | 9              | 0  | 880           | 40 |
| 30                       | 88          | 4  | 45       | 2  | 390         | 9  | 250           | 10 | 8               | 0  | 10             | 0  | 791           | 24 |
| 60                       | 70          | 12 | 40       | 23 | 285         | 17 | 198           | 5  | 11              | 0  | 10             | 0  | 614           | 11 |

**Table S10.** Quantitation data for cv. Koroneiki variety in three different malaxation times at 28 °C

| Malaxation Time<br>(min) | Oleocanthal |    | Oleacein |    | Oleokoronol |    | Oleomis-sional |    | Ligstroside Ag. |    | Oleuropein Ag. |    | Total Phenols |    |
|--------------------------|-------------|----|----------|----|-------------|----|----------------|----|-----------------|----|----------------|----|---------------|----|
|                          | mean        | SD | mean     | SD | mean        | SD | mean           | SD | mean            | SD | mean           | SD | mean          | SD |
| 15                       | 101         | 3  | 82       | 1  | 299         | 31 | 140            | 21 | 9               | 1  | 9              | 0  | 640           | 40 |
| 30                       | 230         | 4  | 170      | 2  | 128         | 13 | 68             | 12 | 10              | 0  | 10             | 0  | 616           | 29 |
| 60                       | 242         | 12 | 150      | 5  | 14          | 9  | 0              | 9  | 11              | 0  | 10             | 0  | 427           | 17 |

**Table S11.** The regression b coefficients and their statistically significance levels as  $R^2$  of the linear regression model Total phenols = a + b\*(malaxation time).

| Month    | Malaxation Temperature |                        |                        |
|----------|------------------------|------------------------|------------------------|
|          | 22°C                   | 28°C                   | 32°C                   |
| October  | b= -8.667 ***          | b= -9.587 ***          | b= -7.355 ***          |
|          | R <sup>2</sup> = 0.926 | R <sup>2</sup> = 0.895 | R <sup>2</sup> = 0.895 |
| November | b= -5.136 ***          | b= -5.417 ***          | b= -4.841 ***          |
|          | R <sup>2</sup> = 0.857 | R <sup>2</sup> = 0.852 | R <sup>2</sup> = 0.814 |
| December | b= -7.052 ***          | b= -7.975 ***          | b= -4.694 ***          |
|          | R <sup>2</sup> = 0.723 | R <sup>2</sup> = 0.766 | R <sup>2</sup> = 0.510 |
| January  | b= -6.205 ***          | b= -1.323 ns           | b= -5.801 ***          |
|          | R <sup>2</sup> = 0.862 | R <sup>2</sup> = 0.095 | R <sup>2</sup> = 0.606 |
| February | b= -1.258 ***          | b= -1.632 ***          | b= -2.171 ***          |
|          | R <sup>2</sup> = 0.582 | R <sup>2</sup> = 0.661 | R <sup>2</sup> = 0.789 |

**Table S12.** The results of the analysis of variance (ANOVA) and Duncan's MRT at  $p= 0.05$  for oleocanthal.

| Month    | Malaxation Temperature | Malaxation Time  |                  |                  |
|----------|------------------------|------------------|------------------|------------------|
|          |                        | 15 min           | 30 min           | 45 min           |
| October  | 32                     | 208 <sup>a</sup> | 254 <sup>a</sup> | 237 <sup>b</sup> |
|          | 28                     | 213 <sup>a</sup> | 254 <sup>a</sup> | 264 <sup>a</sup> |
|          | 22                     | 90 <sup>b</sup>  | 117 <sup>b</sup> | 139 <sup>c</sup> |
|          | p                      | ***              | ***              | ***              |
| November | 32                     | 136 <sup>a</sup> | 254 <sup>a</sup> | 267 <sup>a</sup> |
|          | 28                     | 150 <sup>a</sup> | 188 <sup>b</sup> | 195 <sup>b</sup> |
|          | 22                     | 53 <sup>b</sup>  | 99 <sup>c</sup>  | 106 <sup>c</sup> |
|          | p                      | ***              | ***              | ***              |
| December | 32                     | 144 <sup>a</sup> | 168 <sup>a</sup> | 201 <sup>a</sup> |
|          | 28                     | 96 <sup>b</sup>  | 150 <sup>a</sup> | 190 <sup>a</sup> |
|          | 22                     | 44 <sup>c</sup>  | 88 <sup>b</sup>  | 114 <sup>b</sup> |
|          | p                      | ***              | ***              | ***              |
| January  | 32                     | 116 <sup>a</sup> | 106 <sup>a</sup> | 160 <sup>a</sup> |
|          | 28                     | 68 <sup>b</sup>  | 67 <sup>b</sup>  | 124 <sup>b</sup> |
|          | 22                     | 39 <sup>c</sup>  | 67 <sup>b</sup>  | 83 <sup>c</sup>  |
|          | p                      | ***              | **               | ***              |
| February | 32                     | 78 <sup>a</sup>  | 72 <sup>a</sup>  | 85 <sup>a</sup>  |
|          | 28                     | 52 <sup>b</sup>  | 63 <sup>b</sup>  | 53 <sup>b</sup>  |
|          | 22                     | 21 <sup>c</sup>  | 42 <sup>c</sup>  | 45 <sup>c</sup>  |
|          | p                      | ***              | ***              | ***              |

The means followed by the same letter in each month (a, b and c as superscript) are not statistically different.

**Table S13.** The results of the analysis of variance (ANOVA) and Duncan's MRT at  $p= 0.05$  for Oleacein.

| Month    | Malaxation Temperature | Malaxation Temperature |                  |                  |
|----------|------------------------|------------------------|------------------|------------------|
|          |                        | 15 min                 | 30 min           | 45 min           |
| October  | 32                     | 95 <sup>b</sup>        | 56 <sup>b</sup>  | 24 <sup>c</sup>  |
|          | 28                     | 112 <sup>a</sup>       | 68 <sup>a</sup>  | 42 <sup>a</sup>  |
|          | 22                     | 59 <sup>c</sup>        | 56 <sup>b</sup>  | 36 <sup>b</sup>  |
|          | p                      | **                     | *                | **               |
| November | 32                     | 130 <sup>a</sup>       | 201 <sup>a</sup> | 188 <sup>a</sup> |
|          | 28                     | 135 <sup>a</sup>       | 138 <sup>b</sup> | 119 <sup>b</sup> |
|          | 22                     | 48 <sup>b</sup>        | 51 <sup>c</sup>  | 53 <sup>c</sup>  |
|          | p                      | ***                    | ***              | ***              |
| December | 32                     | 147 <sup>a</sup>       | 198 <sup>a</sup> | 195 <sup>a</sup> |
|          | 28                     | 123 <sup>b</sup>       | 147 <sup>b</sup> | 169 <sup>b</sup> |
|          | 22                     | 56 <sup>c</sup>        | 80 <sup>c</sup>  | 92 <sup>c</sup>  |
|          | p                      | ***                    | ***              | ***              |
| January  | 32                     | 114 <sup>a</sup>       | 109 <sup>a</sup> | 107 <sup>a</sup> |
|          | 28                     | 58 <sup>b</sup>        | 53 <sup>b</sup>  | 89 <sup>b</sup>  |
|          | 22                     | 49 <sup>b</sup>        | 42 <sup>c</sup>  | 48 <sup>c</sup>  |
|          | p                      | ***                    | ***              | ***              |
| February | 32                     | 112 <sup>a</sup>       | 126 <sup>a</sup> | 133 <sup>a</sup> |
|          | 28                     | 70 <sup>b</sup>        | 73 <sup>b</sup>  | 87 <sup>b</sup>  |
|          | 22                     | 29 <sup>c</sup>        | 51 <sup>c</sup>  | 49 <sup>c</sup>  |
|          | p                      | ***                    | ***              | ***              |

The means followed by the same letter in each month (a, b and c as superscript) are not statistically different.

**TableS14.** Sampling and experimental planning

| <b>Cultivar</b>   | <b>Region</b> | <b>Harvest Month</b> | <b>Malaxation Temperature (°C)</b> | <b>Malaxation Time (min)</b> |
|-------------------|---------------|----------------------|------------------------------------|------------------------------|
| <b>Koroneiki</b>  | Molaoi        | October              | 22,28,32                           | 15,30,45,60,90               |
|                   |               | November             | 22,28,33                           | 15,30,45,60,90               |
|                   |               | December             | 22,28,34                           | 15,30,45,60,90               |
|                   |               | January              | 22,28,35                           | 15,30,45,60,90               |
|                   |               | February             | 22,28,36                           | 15,30,45,60,90               |
|                   |               |                      |                                    |                              |
| <b>Athenolia</b>  | Molaoi        | November             | 28                                 | 15,30,45,60,90               |
|                   |               | December             | 28                                 | 15,30,45,60,90               |
|                   |               | January              | 28                                 | 15,30,45,60,90               |
|                   |               | February             | 28                                 | 15,30,45,60,90               |
|                   |               |                      |                                    |                              |
| <b>Throubolia</b> | Naxos         | October              | 28                                 | 15,30,60                     |
|                   |               |                      |                                    |                              |
| <b>Olympia</b>    | Ilia          | October              | 28                                 | 15,30,60                     |
|                   |               |                      |                                    |                              |
| <b>Koroneiki</b>  | Kalamata      | October              | 28                                 | 15,30,60                     |
|                   |               |                      |                                    |                              |
| <b>Kalamata</b>   | Sparta        | October              | 28                                 | 15,30,60                     |
